# Supplementary material
Source: PubMed Central journal article supplement (PMC10323759)
Supplement: jamadermatol-e231899-s001.pdf [file jamadermatol-e231899-s001.pdf]

## Supplemental Online Content

Nugent ST, Veerabagu SA, Madden M, et al. Patient preferences for pain control after Mohs micrographic surgery: a single-center discrete choice experiment. *JAMA Dermatol*. Published online July 5, 2023. doi:10.1001/jamadermatol.2023.1899

**eTable 1.** Average preference levels for opioids plus over-the-counter pain management in respondents who were previously prescribed opioids versus respondents with no prior opioid prescription

**eTable 2.** Average preference levels for over-the-counter only pain management in respondents who were previously prescribed opioids versus respondents with no prior opioid prescription

**eFigure.** Sample format of a discrete choice experiment question

This supplemental material has been provided by the authors to give readers additional information about their work.

**eTable 1.** Average preference levels for opioids + over-the-counter pain management in respondents who were previously prescribed opioids versus respondents with no prior opioid prescription

| Attribute                            | Level | Average preference levels (90% CI for levels) |                              |
|--------------------------------------|-------|-----------------------------------------------|------------------------------|
|                                      |       | Prior opioid prescription                     | No prior opioid prescription |
| <b>Risk of addiction</b>             | 12%   | -11.7% (-12.0%, -11.4%)                       | -11.1% (-11.5%, -10.8%)      |
|                                      | 6%    | -3.4% (-4.3%, -2.5%)                          | -4.4% (-5.8%, -3.1%)         |
|                                      | 2%    | -1.8% (-2.6%, -1.0%)                          | -3.1% (-3.9%, -2.2%)         |
|                                      | 0%    | 13.1% (11.3%, 14.7%)                          | 18.6% (17.0%, 20.5%)         |
| <b>Worst pain on pain medication</b> | 8/10  | -27.9% (-29.3%, -26.1%)                       | -26.8% (-28.9%, -24.3%)      |
|                                      | 3/10  | 14.8% (13.6%, 15.8%)                          | 17.6% (16.1%, 18.7%)         |
|                                      | 0/10  | 13.1% (11.3%, 14.7%)                          | 9.3% (6.6%, 12.0%)           |

**eTable 2.** Average preference levels for over-the-counter only pain management in respondents who were previously prescribed opioids versus respondents with no prior opioid prescription

| Attribute                     | Level | Average preference levels (90% CI for levels) |                              |
|-------------------------------|-------|-----------------------------------------------|------------------------------|
|                               |       | Prior opioid prescription                     | No prior opioid prescription |
| Risk of addiction             | 2%    | -6.2% (-6.9%, -5.4%)                          | -8.6% (-9.5%, -7.8%)         |
|                               | 0%    | 6.2% (5.4%, 6.9%)                             | 8.6% (7.8%, 9.5%)            |
| Worst pain on pain medication | 8/10  | -47.9% (-49.2%, -46.7%)                       | -44.1% (-45.3%, -42.7%)      |
|                               | 3/10  | 11.3% (10.1%, 12.4%)                          | 11.1% (9.9%, 12.2%)          |
|                               | 0/10  | 36.6% (35.3%, 38.1%)                          | 33.0% (31.5%, 34.3%)         |

**eFigure. Sample format of a discrete choice experiment question.** Each of the values were randomly changed and participants viewed 12 total of these computer-generated options. The columns also varied (which option was listed first) to avoid bias in selection.

Which of the following medications would you choose?

| Medication Effects                              | <u>Only</u> Over-the-Counter Medications                                                                                              | <u>Opioids</u> + Over-the-Counter Medications |
|-------------------------------------------------|---------------------------------------------------------------------------------------------------------------------------------------|-----------------------------------------------|
| Worst pain experienced while on pain medication | <u>8/10</u><br>(Physical activity severely limited. You can read and converse with effort. Nausea and dizziness may occur from pain.) | <u>0/10</u><br>(Pain free)                    |
| Risk of nausea/vomiting/constipation            | 5% (50 in 1000)                                                                                                                       | 40% (400 in 1000)                             |
| Risk of addiction                               | 0% (0 in 1000)                                                                                                                        | 6% (60 in 1000)                               |
|                                                 | CHOOSE                                                                                                                                | CHOOSE                                        |
