# Supplementary material
Source: PubMed Central journal article supplement (PMC10323759)
Supplement: jamadermatol-e231899-s002.pdf [file jamadermatol-e231899-s002.pdf]

## Data Sharing Statement

Nugent. Patient Preferences for Pain Control After Mohs Micrographic Surgery. *JAMA Dermatol.* Published July 05, 2023. doi:10.1001/jamadermatol.2023.1899

### Data

**Data available:** No
